# Supplementary material for: Electrochemical co-deposition of conductive polymer–silica hybrid thin films
Source: Royal Society of Chemistry journal article supplement (doi:10.1039/c3cp50457c), 2013-01-01
Supplement: c3cp50457c.pdf [file c3cp50457c.pdf]

# Electrochemical co-deposition of conductive polymer/silica hybrid thin films

Moran Raveh, Liang Liu and Daniel Mandler\*

Institute of Chemistry, the Hebrew University of Jerusalem, Jerusalem 91904, Israel

\*Email: daniel.mandler@mail.huji.ac.il

## Supporting Information

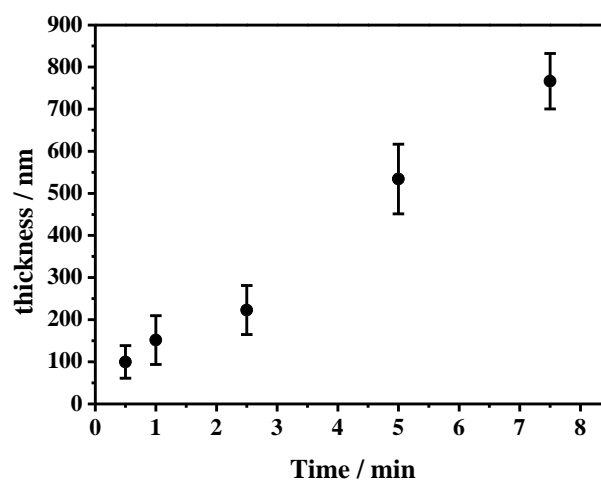

**Fig. S1** Step-height measurements using profilometry for polypyrrole films prepared at a constant potential of 1.3 V for different duration. The deposition solution contained 0.25 M TMOS, 0.01M pyrrole, 0.1 M LiClO<sub>4</sub> and the pH was adjusted to 3.5 by HClO<sub>4</sub>.

**Tab. S1** Element percentage of bare stainless steel after cleaning and sputtering with Au/Pd for 50 s as measured by EDX.

| Element       | C     | N    | O    | Si   | Cl   | Cr    | Fe    | Ni   | Au   | Pd   |
|---------------|-------|------|------|------|------|-------|-------|------|------|------|
| <b>Avg.</b>   | 11.57 | 0.53 | 2.62 | 0.39 | 0.14 | 15.58 | 54.64 | 7.11 | 4.92 | 2.50 |
| <b>Stdev.</b> | 0.55  | 0.52 | 0.12 | 0.18 | 0.10 | 0.55  | 0.27  | 0.15 | 0.06 | 0.18 |

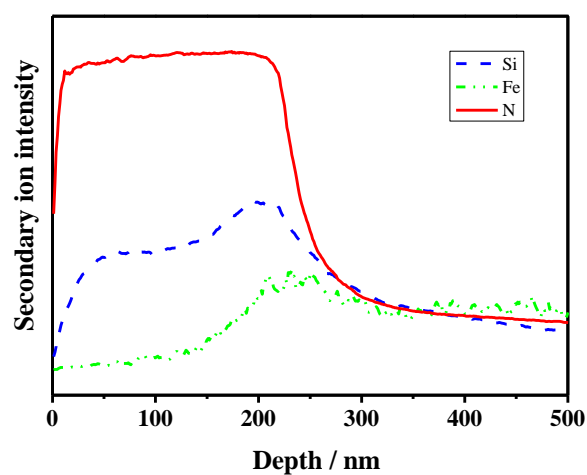

**Fig. S2** The depth profile of elements as derived from SIMS for the samples prepared at 1.5V for 90 s followed by -1.5V for 300 s.

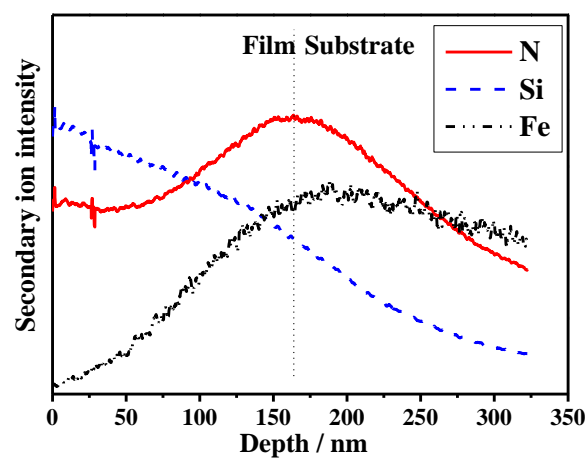

**Fig. S3** The depth profile of elements as derived from SIMS for the samples prepared at -1.5 V for 15 s followed by 1.5V for 300 s.
